# Supplementary material for: The Genomic Context for the Evolution and Transmission of Community-Associated Staphylococcus aureus ST59 Through the Food Chain
Source: Front Microbiol. 2020 Mar 17;11:422. doi: 10.3389/fmicb.2020.00422 (PMC7090029; doi:10.3389/fmicb.2020.00422)
Supplement: Supplementary file 4 [file Table_1.XLSX]

## Sheet: Sheet1
Table S1. Information for Staphylococcus aureus isolates analyzed in this study
Strain	Source	Location	Date	MRSA/MSSA	STs	spa type	PVL	SAK	Accession Number	Genome size (bp)	Number of contigs	Contig N50 (bp)
274	Aquatic product	Shenzhen	20111215	MSSA	ST59	t437	-	-	WKZM00000000	2724544	60	108380
384	Edible mushroom	Zhanjiang	20120105	MSSA	ST59	t437	-	-	WKZN00000000	2777287	73	134709
393	Ready-to-eat food	Zhanjiang	20120105	MSSA	ST59	t437	-	-	WKZO00000000	2756407	72	162982
435	Edible mushroom	Shantou	20120217	MRSA	ST59	t437	-	+	WKZP00000000	2808907	70	118642
446	Quick-frozen product	Shantou	20120217	MRSA	ST59	t441	-	+	WKZQ00000000	2825630	65	113287
522	Retail meat	Haikou	20120503	MRSA	ST59	t437	+	-	WKZR00000000	2871624	81	106851
656	Aquatic product	Nanning	20120702	MSSA	ST59	t1151	-	-	WKZS00000000	2761689	104	109120
673	Aquatic product	Nanning	20120702	MRSA	ST59	t437	+	-	WKZT00000000	2784451	62	105279
705	Aquatic product	Fuzhou	20120719	MRSA	ST59	t437	+	+	WKZU00000000	2771826	78	109424
740	Aquatic product	Fuzhou	20120719	MRSA	ST59	t437	+	+	WKZV00000000	2826946	93	98909
1032	Quick-frozen product	Chengdu	20121016	MSSA	ST59	t3485	-	+	WKZW00000000	2756159	81	163357
1275	Aquatic product	Taiyuan	20121211	MSSA	ST59	t437	-	-	WKZX00000000	2706563	69	134783
2939	Ready-to-eat food	Guiyang	20150727	MRSA	ST59	t437	-	-	WKZY00000000	2816028	84	86891
3013	Vegetable	Xining	20150820	MSSA	ST59	t437	-	-	WKZZ00000000	2744645	107	103128
3025	Retail meat	Xining	20150820	MRSA	ST59	t437	+	+	WLAA00000000	2789388	74	102833
3046	Edible mushroom	Xining	20150820	MRSA	ST59	t437	+	-	WLAB00000000	2796769	75	109223
3295	Quick-frozen product	Shijiazhuang	20151015	MRSA	ST59	t437	+	+	WLAC00000000	2837586	98	104284
3551	Retail meat	Changsha	20160112	MRSA	ST59	t437	-	+	WLAD00000000	2740162	67	111763
3939	Ready-to-eat food	Zhengzhou	20160407	MRSA	ST59	t437	+	-	WLAE00000000	2813183	72	98308
4226	Aquatic product	Urumchi	20160504	MSSA	ST59	t437	-	-	WLAF00000000	2797066	101	124041
4255	Aquatic product	Lasa	20160504	MRSA	ST59	t437	+	+	WLAG00000000	2773166	76	132836
4297	Edible mushroom	Lasa	20160504	MRSA	ST59	t437	+	+	WLAH00000000	2773052	73	94921
112-1	Ready-to-eat food	Guangzhou	20130924	MRSA	ST59	t437	+	-	WLAI00000000	2750703	66	109038
1827	Aquatic product	Shaoguan	20130516	MSSA	ST59	t437	-	-	WLAJ00000000	2755659	72	108679
1923-1	Retail meat	Xi'an	20130711	MSSA	ST59	t437	-	-	WLAK00000000	2759779	108	109235
1923-2	Retail meat	Xi'an	20130711	MSSA	ST59	t437	-	-	WLAL00000000	2755851	93	127570
1931-0	Aquatic product	Xi'an	20130711	MSSA	ST59	t437	+	-	WLAM00000000	2794842	87	169630
1945-0	Quick-frozen product	Xi'an	20130711	MSSA	ST59	t1751	-	-	WLAN00000000	2741559	77	131876
1945-1	Quick-frozen product	Xi'an	20130711	MSSA	ST59	t1751	-	-	WLAO00000000	2743183	95	105899
1956-2	Aquatic product	Harbin	20130718	MSSA	ST59	t437	+	-	WLAP00000000	2792381	75	126679
1975-0	Retail meat	Harbin	20130718	MSSA	ST59	t437	+	-	WLAQ00000000	2796781	86	108300
1975-1	Retail meat	Harbin	20130718	MSSA	ST59	t437	+	-	WLAR00000000	2798389	109	126546
2223-0	Retail meat	Fuzhou	20131103	MRSA	ST59	t437	+	-	WLAS00000000	2832513	78	103064
2223-1	Retail meat	Fuzhou	20131103	MRSA	ST59	t437	+	-	WLAT00000000	2830343	77	104327
2223-2	Retail meat	Fuzhou	20131103	MRSA	ST59	t437	+	-	WLAU00000000	2827842	77	106904
2230-0	Aquatic product	Fuzhou	20131103	MRSA	ST59	t437	+	+	WLAV00000000	2794313	96	109086
2284-0	Ready-to-eat food	Nanning	20131115	MRSA	ST59	t437	-	-	WLAW00000000	2755366	74	106926
24-0	Retail meat	Guangzhou	20130909	MRSA	ST59	t437	+	+	WLAX00000000	2841067	77	134836
24-1	Retail meat	Guangzhou	20130909	MRSA	ST59	t437	+	+	WLAY00000000	2888572	104	108821
247-0	Edible mushroom	Guangzhou	20131015	MRSA	ST59	t437	-	+	WLAZ00000000	2732781	54	138262
2574-0	Retail meat	Chengdu	20140312	MRSA	ST59	t1751	-	+	WLBA00000000	2792301	73	104050
2704-0	Aquatic product	Shanghai	20140423	MRSA	ST59	t437	+	+	WLBB00000000	2786820	77	127746
2778-1	Aquatic product	Kunming	20140506	MRSA	ST338	t437	+	-	WLBC00000000	2811906	82	100559
2780-0	Aquatic product	Kunming	20140506	MRSA	ST338	t437	+	-	WLBD00000000	2812611	71	105246
2780-1	Aquatic product	Kunming	20140506	MRSA	ST338	t437	+	-	WLBE00000000	2814995	68	104438
2780-2	Aquatic product	Kunming	20140506	MRSA	ST338	t437	+	-	WLBF00000000	2811623	73	106751
3046A1	Edible mushroom	Xining	20150820	MRSA	ST59	t437	+	-	WLBG00000000	2794380	68	108937
3046B3	Edible mushroom	Xining	20150820	MRSA	ST59	t437	+	-	WLBH00000000	2835859	106	106841
3109A3	Ready-to-eat food	Hohhot	20130831	MRSA	ST59	t437	-	+	WLBI00000000	2772059	65	109224
3373C1	Retail meat	Lasa	20151115	MRSA	ST59	t437	-	+	WLBJ00000000	2766224	69	106716
3652C1	Retail meat	Hangzhou	20160225	MRSA	ST3355	t3485	-	+	WLBK00000000	2780254	118	127686
3939A1	Ready-to-eat food	Zhengzhou	20160407	MRSA	ST59	t437	-	+	WLBL00000000	2784355	124	134892
3939A2	Ready-to-eat food	Zhengzhou	20160407	MRSA	ST59	t437	-	+	WLBM00000000	2775487	83	139166
4018A1	Quick-frozen product	Hohhot	20160504	MRSA	ST59	t1751	-	+	WLBN00000000	2826022	85	98105
4090A1	Vegetable	Changchun	20160504	MRSA	ST59	t437	-	+	WLBO00000000	2821199	90	103013
4090A2	Vegetable	Changchun	20160504	MRSA	ST59	t437	-	+	WLBP00000000	2820738	80	104716
4126A1	Aquatic product	Macao	20160504	MRSA	ST59	t437	-	+	WLBQ00000000	2830132	70	109199
4127A1	Aquatic product	Macao	20160504	MRSA	ST59	t437	-	+	WLBR00000000	2829201	67	122369
4226B2	Aquatic product	Urumchi	20160504	MSSA	ST59	t437	-	-	WLBS00000000	2793781	91	127689
4230A2	Aquatic product	Urumchi	20160504	MSSA	ST59	t437	-	-	WLBT00000000	2796151	104	134707
4252A1	Retail meat	Lasa	20160504	MRSA	ST59	t543	-	+	WLBU00000000	2765244	69	121051
4255B2	Aquatic product	Lasa	20160504	MRSA	ST59	t437	+	+	WLBV00000000	2769372	81	106691
4272C1	Retail meat	Lasa	20160504	MRSA	ST59	t437	+	+	WLBW00000000	2775631	78	109374
590-C	Aquatic product	Sanya	20120517	MSSA	ST59	t3485	-	-	WLBX00000000	2754491	150	112297
80-0	Aquatic product	Guangzhou	20130916	MSSA	ST59	t437	-	-	WLBY00000000	2721531	61	134733
917-0	Quick-frozen product	Nanchang	20120923	MRSA	ST59	t441	-	-	WLBZ00000000	2764032	66	109186
95-0	Quick-frozen product	Guangzhou	20130916	MSSA	ST59	t437	-	+	WLCA00000000	2801478	93	134522
95-1	Quick-frozen product	Guangzhou	20130916	MSSA	ST59	t437	-	+	WLCB00000000	2835421	130	126354
L16	human	Guangzhou	20171027	MRSA	ST59	N/A	+	-	WLCC00000000	2795742	93	168671
L17	human	Guangzhou	20171128	MRSA	ST59	N/A	-	+	WLCD00000000	2743355	60	184137
L18	human	Guangzhou	20170727	MRSA	ST59	N/A	-	+	WLCE00000000	2778274	78	169683
L19	human	Guangzhou	20171129	MRSA	ST59	N/A	-	+	WLCF00000000	2826823	85	147769
YK046	Retail meat	Shandong	2015-07	MRSA	ST59	N/A	-	+	GCA_003309045.1	2738754	39	146786
S15	Retail meat	Lanzhou	20181201	MRSA	ST59	N/A	-	+	GCA_006158985.1	2822919	2	2796973
SA40	human	Taiwan	Jul-2005	MRSA	ST59	N/A	-	+	GCA_000470865.1	2728308	1	2728308
M013	human	Taiwan	Jul-2002	MRSA	ST59	N/A	+	-	GCA_000237125.2	2788636	1	2788636
SA957	human	Taiwan	Jul-2000	MRSA	ST59	N/A	+	-	GCA_000470845.1	2789538	1	2789538
SA268	human	Hangzhou	20120301	MRSA	ST59	N/A	+	-	GCA_000737615.1	2833899	1	2833899
MS4	human	Shenzhen	20120705	MRSA	ST59	N/A	+	-	GCA_001456215.1	2709797	1	2709797
AR1	human	Shandong	Apr-2016	MRSA	ST59	N/A	-	+	GCA_003310775.1	2796006	51	127207
AR3	human	Shandong	Apr-2016	MRSA	ST59	N/A	-	+	GCA_003310335.1	2790829	51	120050
M1	human	Ningxia	20140701	MRSA	ST59	N/A	+	+	GCA_001412275.1	2834019	7	2547872
HZW450	human	Hangzhou	20160808	MRSA	ST59	N/A	+	-	GCA_002442975.1	2831958	1	2831958
AD010	human	Shandong	2015-07	MRSA	ST59	N/A	-	+	GCA_003310445.1	2791851	55	168473
P1	human	Hongkong	20170904	MRSA	ST59	N/A	+	-	GCA_004168915.1	2776179	54	119035
YNSA210	human	Kunming	20140815	MRSA	ST59	N/A	+	-	GCA_005861085.1	2818704	51	147749
QY01	human	Guangdong	Jul-2015	MRSA	ST59	N/A	+	-	GCA_003345455.1	2761242	101	55648
