# Supplementary material for: The Genomic Context for the Evolution and Transmission of Community-Associated Staphylococcus aureus ST59 Through the Food Chain
Source: Front Microbiol. 2020 Mar 17;11:422. doi: 10.3389/fmicb.2020.00422 (PMC7090029; doi:10.3389/fmicb.2020.00422)
Supplement: Supplementary file 7 [file Table_4.XLSX]

## Sheet: Sheet1
Table S4. The resistance levels to multiple antibiotics of Staphylococcus aureus isolates
Strain	AMC	AMP	FEP	FOX	P	CAZ	AK	CN	K	S	C	DA	E	TEL	CIP	NOR	TE	LZD	RD	SXT	QD	TEC	F	FD
24-0	R	R	R	R	R	R	S	S	R	R	S	R	R	R	S	S	R	S	S	S	S	S	S	S
24-1	R	R	R	R	R	R	S	S	R	R	S	R	R	R	S	S	R	S	S	S	S	S	S	S
80-0	R	R	R	R	R	R	S	S	R	R	R	R	R	R	S	S	R	S	S	S	S	S	S	S
95-0	S	R	S	S	R	S	S	S	R	R	R	R	R	R	S	S	R	S	S	S	S	I	S	S
95-1	S	R	S	S	R	S	S	S	R	R	R	R	R	R	S	S	R	S	S	S	S	S	S	S
247-0	S	R	S	R	R	R	S	S	R	R	S	R	R	R	S	S	S	S	S	S	S	S	S	S
274	R	R	R	R	R	R	I	S	R	R	R	R	R	R	S	S	R	S	S	S	S	S	S	S
384	S	R	S	S	R	S	S	S	S	S	S	S	S	R	S	S	R	S	S	S	S	I	S	S
393	S	R	S	S	R	S	S	S	S	I	S	I	S	S	I	I	R	S	S	S	S	S	S	S
435	R	R	R	R	R	R	R	S	R	R	I	R	R	R	S	S	R	S	S	S	S	S	S	S
446	R	R	R	R	R	R	I	S	R	R	S	R	R	R	S	S	S	S	S	S	S	I	I	S
1827	S	R	R	R	R	R	S	S	R	R	I	R	R	R	S	S	R	S	S	S	S	S	S	S
522	S	R	S	R	R	R	I	S	R	R	R	R	R	R	S	S	R	S	R	S	S	S	S	S
590-C	S	R	S	S	R	S	I	S	R	R	I	R	R	R	S	S	S	S	S	S	S	S	S	S
656	S	R	S	S	R	S	I	S	R	R	R	R	R	R	S	S	R	S	S	S	S	S	S	S
673	R	R	R	R	R	R	I	S	R	R	S	R	R	I	I	S	R	S	S	S	S	S	S	S
705	R	R	I	R	R	R	S	S	R	R	S	R	R	R	S	S	S	S	S	S	S	S	S	S
740	R	R	I	R	R	R	S	S	R	R	S	R	R	R	S	S	R	S	S	S	S	I	S	S
2223-0	S	R	I	R	R	R	I	S	R	R	S	R	R	R	S	S	S	S	S	S	S	S	S	S
2223-1	S	R	I	R	R	R	I	S	R	R	S	R	R	R	I	S	S	S	S	S	S	S	S	S
2223-2	S	R	I	R	R	R	I	S	R	R	I	R	R	R	I	I	S	S	S	S	S	S	S	S
2230-0	R	R	S	R	R	R	S	S	R	R	I	R	R	R	S	S	S	S	S	S	S	S	S	S
2284-0	R	R	R	R	R	R	S	S	S	I	S	S	S	S	S	S	R	S	S	S	S	S	S	S
917-0	R	R	R	R	R	R	I	S	R	R	I	R	R	R	I	S	S	S	S	S	S	S	S	S
1032	S	R	S	S	R	S	S	S	R	R	R	R	R	R	S	S	R	S	S	S	S	S	S	S
1275	S	R	S	S	R	S	S	R	R	S	S	R	R	R	S	S	R	S	S	S	S	S	S	S
1956-2	S	R	S	S	R	S	R	S	R	R	R	R	R	R	I	S	S	S	S	S	S	S	S	S
1975-0	S	R	S	S	R	S	R	S	R	R	R	R	R	R	I	S	S	S	S	S	I	I	S	S
1975-1	S	R	S	S	R	S	I	S	R	R	R	R	R	R	I	S	S	S	S	S	S	S	S	S
1923-1	S	R	S	S	R	S	I	S	R	R	R	R	R	R	S	S	R	S	S	S	S	S	S	R
1923-2	S	R	S	S	R	S	I	S	R	R	R	R	R	R	S	S	R	S	S	S	S	S	S	S
1931-0	S	R	S	S	R	S	I	S	R	R	R	R	R	R	I	R	S	S	S	S	S	S	S	S
1945-0	S	R	S	S	R	S	I	S	I	R	I	R	R	R	S	S	S	S	S	S	S	S	S	S
1945-1	S	R	S	S	R	S	S	S	S	R	I	R	R	R	S	S	S	S	S	S	S	S	S	S
2704-0	R	R	R	R	R	R	R	S	R	R	I	R	R	R	S	S	R	S	S	S	S	I	S	S
2574-0	R	R	R	R	R	R	I	S	I	R	R	R	R	R	S	S	S	S	S	S	I	I	I	R
2939	R	R	R	R	R	R	I	S	R	R	I	R	R	R	S	S	R	S	S	S	S	I	S	R
3013	S	R	S	S	R	S	S	S	S	I	S	S	S	S	S	S	R	S	S	S	S	S	S	S
3025	R	R	S	R	R	R	I	S	R	R	I	R	R	R	S	S	R	S	S	S	S	S	S	S
3046	R	R	R	R	R	S	I	S	R	R	R	R	R	R	S	S	R	S	S	S	S	I	S	R
3046A1	R	R	I	R	R	R	I	S	R	R	R	R	R	R	S	S	R	S	S	S	S	I	S	S
3046B3	R	R	R	R	R	R	I	S	R	R	R	R	R	R	S	I	R	S	S	S	S	I	S	R
3109A3	R	R	I	R	R	R	I	S	R	R	I	R	R	R	S	S	S	S	S	S	S	S	S	S
3295	R	R	R	R	R	R	I	S	R	R	R	R	R	R	I	R	S	S	S	S	I	I	I	R
3373C1	R	R	I	R	R	R	I	S	R	R	I	R	R	R	S	S	R	S	S	S	S	I	S	R
3551	R	R	R	R	R	R	I	S	I	I	I	R	R	R	R	I	R	S	S	S	S	I	S	S
3939	R	R	R	R	R	R	I	S	R	R	I	R	R	R	S	S	R	S	S	S	S	S	S	R
3939A1	R	R	R	R	R	R	R	S	R	R	R	R	R	R	I	I	R	S	S	S	S	I	I	R
3939A2	R	R	R	R	R	R	R	S	R	R	R	R	R	R	I	I	R	S	S	S	S	I	I	R
4090A1	R	R	R	R	R	R	R	S	R	R	R	R	R	R	R	I	R	S	S	S	S	I	S	S
4090A2	R	R	R	R	R	R	I	S	R	R	I	R	R	R	R	I	R	S	S	S	I	I	S	S
4018A1	R	R	I	R	R	R	S	R	S	I	R	R	R	R	S	S	R	S	S	S	S	S	S	S
4126A1	R	R	R	R	R	R	R	S	R	R	I	R	R	R	S	S	S	S	S	S	S	I	S	R
4127A1	R	R	I	R	R	R	I	S	R	R	I	R	R	R	S	S	S	S	S	S	I	I	I	R
4226	S	R	S	S	R	S	R	S	R	R	R	R	R	R	S	S	R	S	S	S	S	I	I	R
4226B2	S	R	S	S	R	I	R	S	R	R	R	R	R	R	S	S	R	S	S	S	I	I	S	R
4230A2	S	R	S	S	R	S	I	S	R	R	R	R	R	R	S	S	R	S	S	S	I	I	I	R
4252A1	R	R	R	R	R	R	R	S	R	R	R	R	R	R	R	S	R	S	S	S	R	I	R	R
4255	R	R	R	R	R	R	R	S	R	R	I	R	R	R	S	S	S	S	S	S	I	I	I	R
4255B2	R	R	R	R	R	R	R	S	R	R	R	R	R	R	S	S	I	S	S	S	I	I	I	R
4272C1	S	R	S	R	R	R	R	S	R	R	I	R	R	R	S	S	S	S	S	S	S	I	S	S
4297	R	R	R	R	R	R	R	S	R	R	I	R	R	R	S	S	I	S	S	S	I	I	I	R
3652C1	R	R	R	R	R	R	R	R	R	R	I	R	R	R	I	S	R	S	S	S	S	I	S	R
2778-1	R	R	R	R	R	R	R	S	R	R	R	R	R	R	S	S	R	S	S	S	I	I	I	R
2780-0	R	R	R	R	R	R	R	I	R	R	R	R	R	R	S	S	R	S	S	S	S	I	S	R
2780-1	R	R	R	R	R	R	R	S	R	R	R	R	R	R	S	S	R	S	S	S	S	S	S	R
2780-2	R	R	I	R	R	R	R	S	R	R	R	R	R	R	S	S	R	S	S	S	S	I	S	S
112-1	S	R	I	R	R	R	S	S	R	R	R	R	R	R	S	I	R	S	S	S	S	S	S	S
