# Supplementary material for: The Genomic Context for the Evolution and Transmission of Community-Associated Staphylococcus aureus ST59 Through the Food Chain
Source: Front Microbiol. 2020 Mar 17;11:422. doi: 10.3389/fmicb.2020.00422 (PMC7090029; doi:10.3389/fmicb.2020.00422)
Supplement: Supplementary file 8 [file Table_5.XLSX]

## Sheet: Sheet1
Table S5. Pairwise correlation of antibiotics resistance patterns of Staphylococcus aureus isolates from different conditions
Source_strain	Target_strain	Pairwise correlation value	P-value	Condition
1956-2	1931-0	0.885559	8.87071e-09	Food chain-transmission
2939	3939	0.977333	2.5182e-16	Food chain-transmission
4230A2	4226	0.953463	6.15714e-13	Recent local transmission
4230A2	4226B2	0.928026	6.61492e-11	Recent local transmission
4297	4255	0.973894	1.17227e-15	Recent local transmission
4297	4255B2	0.972112	2.40403e-15	Recent local transmission
1975-0	1956-2	0.957417	2.36169e-13	Recent local transmission
1975-1	1956-2	0.978006	1.81343e-16	Recent local transmission
2780-0	2778-1	0.920939	1.7972e-10	Recent local transmission
2780-1	2778-1	0.941554	7.1379e-12	Recent local transmission
2780-2	2778-1	0.850923	1.37419e-07	Recent local transmission
4127A1	4126A1	0.901388	1.86127e-09	Recent local transmission
4226B2	4226	0.931409	3.95828e-11	Direct transmission
4255	4255B2	0.949341	1.53619e-12	Direct transmission
2223-1	2223-0	0.977299	2.55964e-16	Direct transmission
2223-2	2223-0	0.936478	1.74208e-11	Direct transmission
2223-2	2223-1	0.954531	4.79318e-13	Direct transmission
3046A1	3046	0.786607	5.16161e-06	Direct transmission
3046B3	3046	0.886754	7.94915e-09	Direct transmission
3046B3	3046A1	0.866031	4.56625e-08	Direct transmission
4090A2	4090A1	0.920458	1.91699e-10	Direct transmission
24-1	24-0	1	0	Direct transmission
3939A2	3939A1	1	0	Direct transmission
1975-1	1975-0	0.936175	1.83334e-11	Direct transmission
2780-1	2780-0	0.958927	1.59884e-13	Direct transmission
2780-2	2780-0	0.869905	3.36939e-08	Direct transmission
2780-2	2780-1	0.867227	4.16137e-08	Direct transmission
1923-2	1923-1	0.914121	4.32237e-10	Direct transmission
1945-1	1945-0	0.948519	1.82636e-12	Direct transmission
95-1	95-0	0.978517	1.40358e-16	Direct transmission
1923-1	1931-0	0.705518	0.000117649	Indenpend contamination
1923-2	1931-0	0.793153	3.78656e-06	Indenpend contamination
1945-0	1931-0	0.850923	1.37419e-07	Indenpend contamination
1945-1	1931-0	0.774868	8.76681e-06	Indenpend contamination
1923-1	1945-0	0.794978	3.46654e-06	Indenpend contamination
1923-2	1945-0	0.870495	3.21426e-08	Indenpend contamination
3939A1	3939	0.888708	6.62576e-09	Indenpend contamination
3939A2	3939	0.888708	6.62576e-09	Indenpend contamination
2223-0	740	0.784708	5.63559e-06	Indenpend contamination
2223-1	740	0.751124	2.3405e-05	Indenpend contamination
2223-2	740	0.685514	0.000218208	Indenpend contamination
2230-0	740	0.851624	1.30918e-07	Indenpend contamination
2223-1	705	0.862194	6.11447e-08	Indenpend contamination
2230-0	705	0.955801	3.53043e-13	Indenpend contamination
740	705	0.896446	3.11249e-09	Indenpend contamination
4255	4252A1	0.742046	3.31306e-05	Indenpend contamination
4255B2	4252A1	0.821727	8.51093e-07	Indenpend contamination
4272C1	4252A1	0.486622	0.0158929	Indenpend contamination
4297	4252A1	0.802902	2.3379e-06	Indenpend contamination
24-0	112-1	0.783349	5.99817e-06	Indenpend contamination
24-1	112-1	0.783349	5.99817e-06	Indenpend contamination
247-0	112-1	0.80904	1.70221e-06	Indenpend contamination
95-0	112-1	0.77346	9.32238e-06	Indenpend contamination
95-1	112-1	0.80904	1.70221e-06	Indenpend contamination
80-0	112-1	0.873426	2.53444e-08	Indenpend contamination
24-0	95-1	0.602464	0.00183667	Indenpend contamination
247-0	95-1	0.644444	0.000676222	Indenpend contamination
95-0	80-0	0.673905	0.000305734	Indenpend contamination
95-1	80-0	0.712525	9.36349e-05	Indenpend contamination
24-0	80-0	0.919866	2.0739e-10	Indenpend contamination
247-0	80-0	0.712525	9.36349e-05	Indenpend contamination
247-0	24-0	0.774597	8.87156e-06	Indenpend contamination
3025	3013	0.450832	0.0270353	Indenpend contamination
3046	3013	0.381518	0.0658326	Indenpend contamination
3046A1	3013	0.407415	0.0481482	Indenpend contamination
3046B3	3013	0.344004	0.0997674	Indenpend contamination
3046	3025	0.69239	0.000177428	Indenpend contamination
4252A1	3373C1	0.67369	0.000307605	Indenpend contamination
4255	4272C1	0.721476	6.92722e-05	Indenpend contamination
4255B2	4272C1	0.702525	0.000129448	Indenpend contamination
1945-0	1923-2	0.870495	3.21426e-08	Indenpend contamination
1945-1	1923-2	0.791038	4.19008e-06	Indenpend contamination
4272C1	3373C1	0.697644	0.00015091	Indenpend contamination
4297	3373C1	0.874435	2.33233e-08	Indenpend contamination
393	384	0.649729	0.00059007	Indenpend contamination
